# Supplementary material
Source: PubMed Central journal article supplement (PMC2684963)

**A** Toll-Venus FRAP - surface view / preblastoderm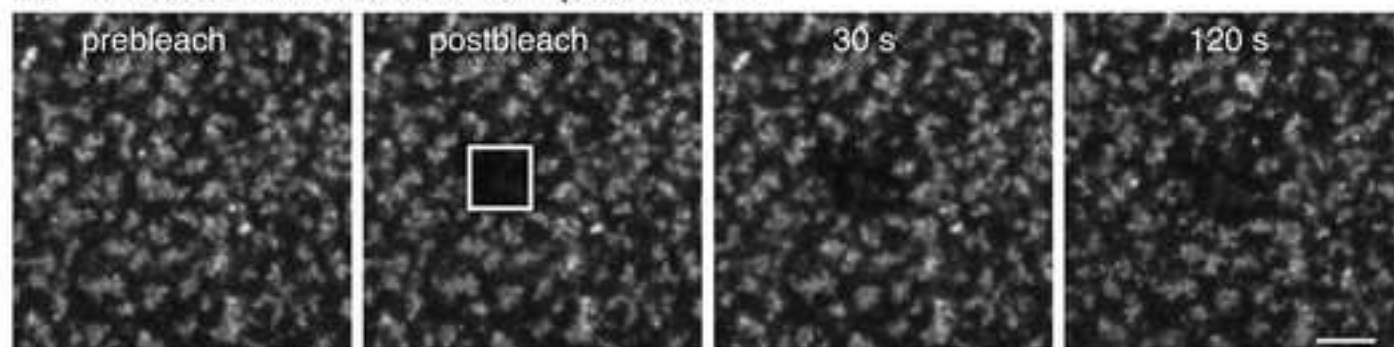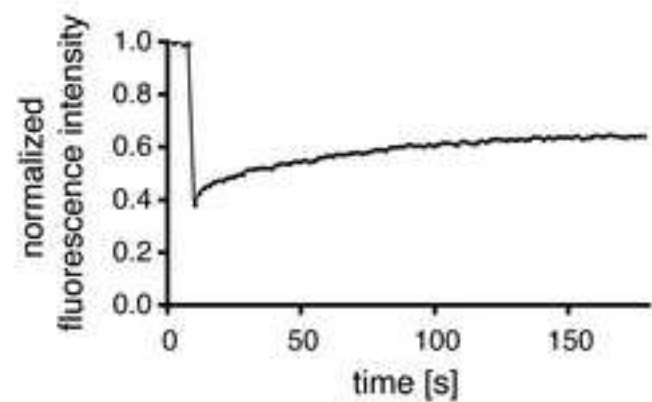**B** Toll-PA-GFP<sup>05</sup> photoactivation - surface view / preblastoderm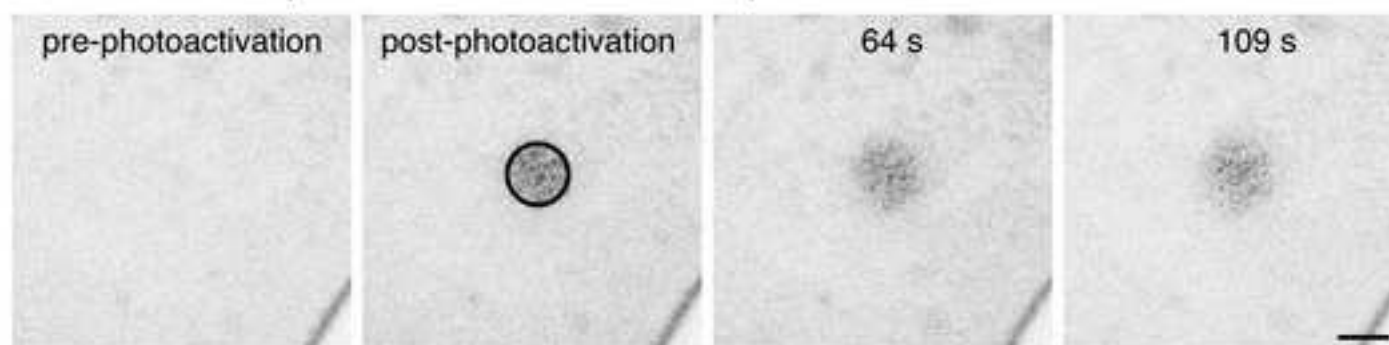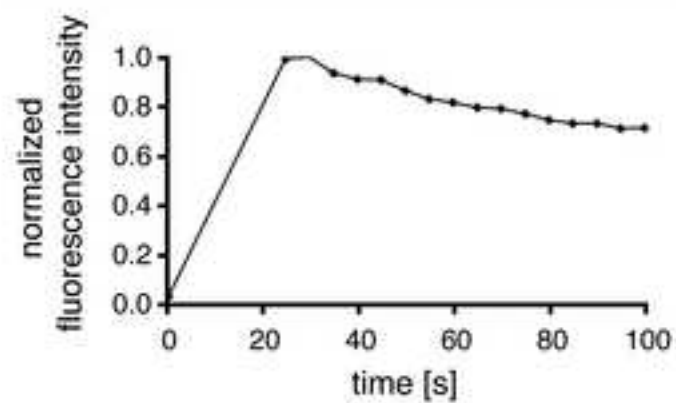

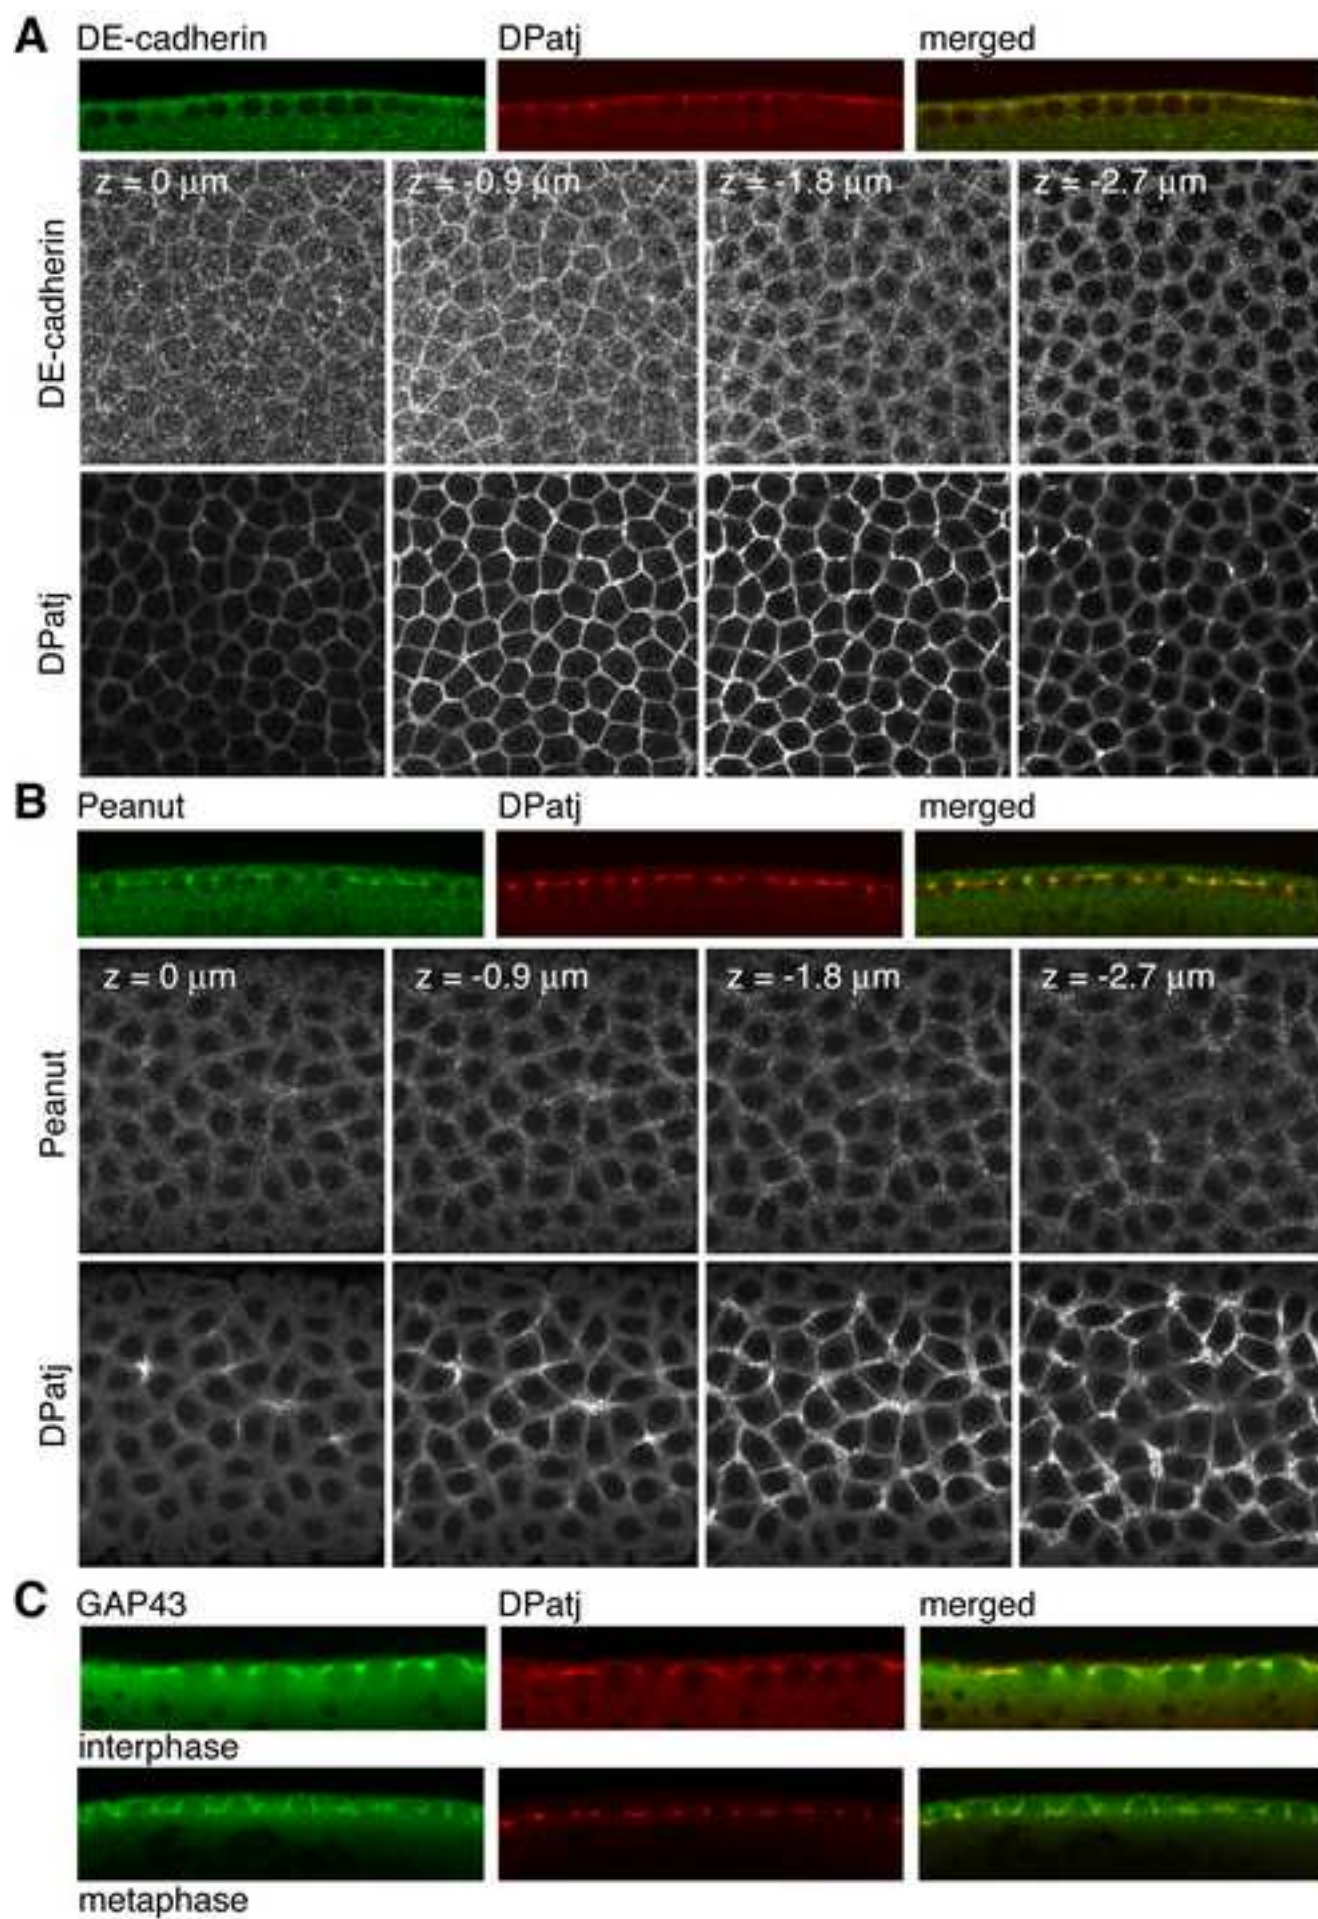

**Toll-PA-GFP<sup>05</sup> photoactivation - surface view / nuclear cycle 12**

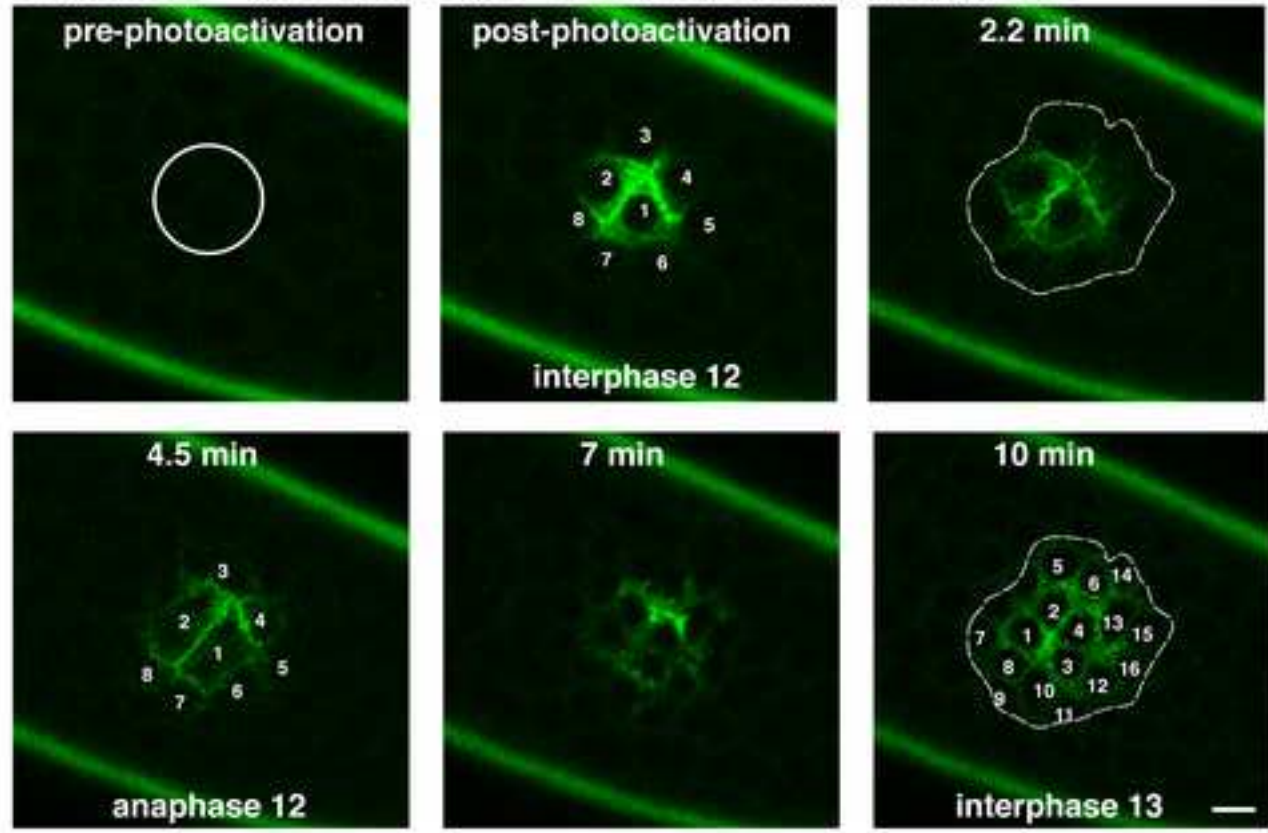

**A** Peanut in latA-injected embryos

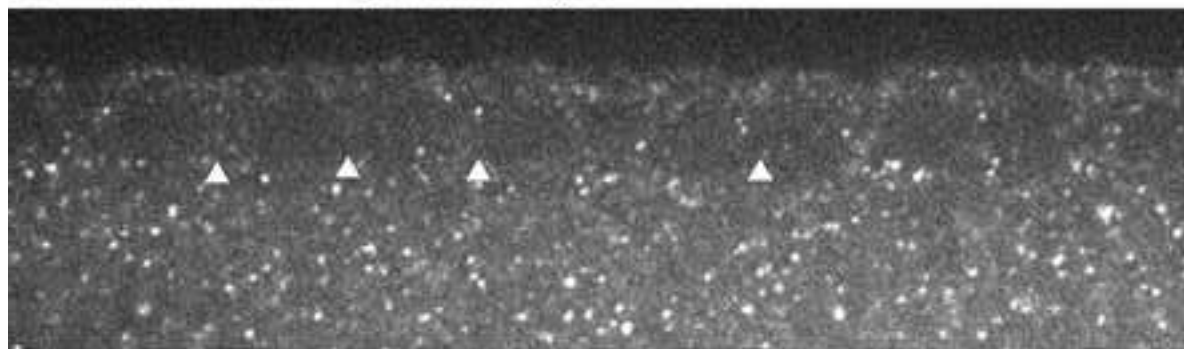

DPatj in latA-injected embryos

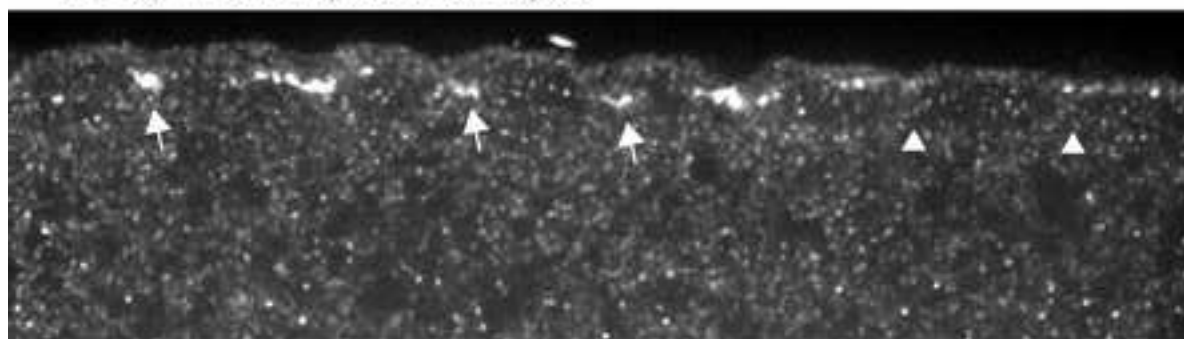

**B** GAP43-mEosFP in latA-injected embryos

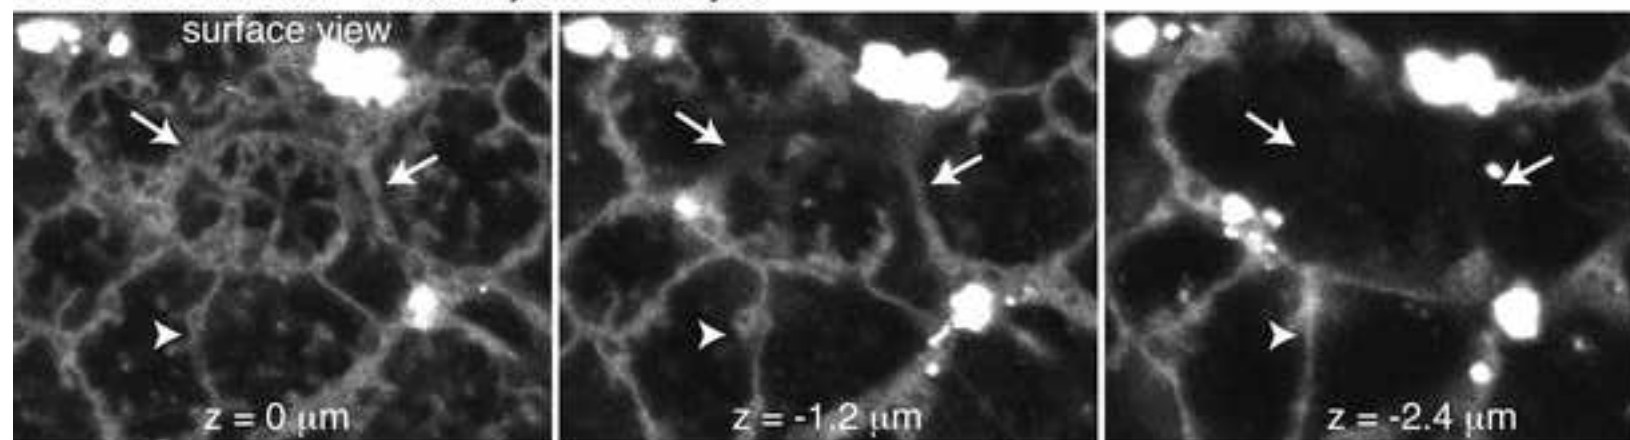

Supplement: NIHMS108050-supplement-01.pdf [file NIHMS108050-supplement-01.pdf]
